# Supplementary material
Source: MDPI journal article supplement (https://www.mdpi.com/2073-4395/11/9/1725)
Supplement: s1 [file s1]

[Supplementary Materials]

**Table S1.** *Arabidopsis* auxin pathway related genes and Pfam annotation of studied genes

**Table S2.** List of primer for qRT-PCR

**Table S3.** Transcriptome sequence of in *R. officinalis* auxin pathway related genes.

**Table S1.** *Arabidopsis* auxin pathway related genes and Pfam annotation of studied genes.

| Name    | <i>Arabidopsis</i> Locus ID | Discription                                                                                                                            | Pfam                    |
|---------|-----------------------------|----------------------------------------------------------------------------------------------------------------------------------------|-------------------------|
| YUC1    | AT4G32540                   | Flavin Monooxygenase-Like Enzyme                                                                                                       | Pyr_redox_3 (PF13738)   |
| AMI1    | AT1G08980                   | AMIDASE-LIKE PROTEIN 1                                                                                                                 | Amidase (PF01425)       |
| CYP79B2 | AT4G39950                   | CYTOCHROME P450, FAMILY 79, SUBFAMILY B                                                                                                | p450 (PF00067)          |
| AO1     | AT5G20960                   | ALDEHYDE OXIDASE 1                                                                                                                     | Ald_Xan_dh_C2 (PF02738) |
| UGT74B1 | AT1G24100                   | UDP-GLUCOSYL TRANSFERASE 74B1                                                                                                          | UDPGT (PF00201)         |
| NIT1    | AT3G44310                   | A. THALIANA NITRILASE 1                                                                                                                | CN_hydrolase (PF00795)  |
| TGG1    | AT5G26000                   | member of Glycoside Hydrolase Family 1                                                                                                 | Glyco_hydro_1 (PF00232) |
| TAA1    | AT1G70560                   | involved in the shade-induced production of indole-3-pyruvate (IPA)                                                                    | Alliinase_C (PF04864)   |
| SUR1    | AT2G20610                   | ABERRANT LATERAL ROOT FORMATION 1                                                                                                      | Aminotran_1_2 (PF00155) |
| VAS1    | AT1G80360                   | It functions downstream of TAA1/SAV3 but upstream of YUCs to negatively modulate IAA biosynthesis directly by altering the 3-IPA pool. | Aminotran_1_2 (PF00155) |
| YUC6    | AT5G25620                   | Encodes a member of a family of flavin monooxygenases with an important role in auxin biosynthesis                                     | FMO-like (PF00743)      |
| UBQ9    | AT5G37640                   | Internal control                                                                                                                       | ubiquitin (PF00240)     |

**Table S2.** List of primer for qRT-PCR

| Name      | Sequence                |
|-----------|-------------------------|
| UBQ9_F    | AAGAGTCAACCTTGCACTTGGT  |
| UBQ9_R    | ATATCTTTGCGCTCTCCACCTC  |
| SUR1_F    | TCTTACCTTTGGTAGCAACCCC  |
| SUR1_R    | GGATACCATCAGGGTCGTTTGT  |
| YUC6_F    | CGCTTGTGGTTAGGGATACAGT  |
| YUC6_R    | GCCACGATAAGACGAGCAAAAA  |
| VAS1_F    | AACTCCTCAAGGTGCAAGACAA  |
| VAS1_R    | TTTGAACCTGACTGGTGACCCA  |
| CYP79B_F  | TGCCTTACTTAGACGCCATTGT  |
| CYP79B_R  | AACACCGTCGTCCCTTTTGATA  |
| AMI1_F    | TCTATCAACCGCCTTGAGATCG  |
| AMI1_R    | CCGTTGATCTGATAGCTTCCCA  |
| TGG1_F    | AGCCATGGACTTTATGCTTGGGA |
| TGG1_R    | CCCTATGAAGTCAAAGGACCCC  |
| NIT1_F    | TGATTCAAGGGATGTCTGGCAA  |
| NIT1_R    | GCACCGGAGAAAACATAATCCG  |
| UGT74B1_F | GGACGGTAGAATCGAAGGAGAC  |
| UGT74B1_R | TGTAGATCACTGATTCCTGCGG  |
| TAA1_F    | GGGCTCTTGTGAAGGATCAAGA  |
| TAA1_R    | TGCTCATGGGAGTCTGATAGGA  |
| YUC1_F    | GCCGGGAATAAGCTGCATAAAG  |
| YUC1_R    | AATCGTCTCCCTTAAGCCACTG  |
| AO1_F     | TGGCTGAAGCTGATCACAAGAT  |
| AO1_R     | GCAAATTCAGGGGATTGACTCG  |

**Table S3.** Transcriptome sequence of in *R. officinalis* auxin pathway related genes.

| Name | Sequence                                                                                                                                                                                                                                                                                                                                                                                                                                                                                                                                                                                                                                                                                                                                                                                                                                                                                                                                                                                                                                                                                                                                                                                                                                                                                                                                                                                                                                                                                                     |
|------|--------------------------------------------------------------------------------------------------------------------------------------------------------------------------------------------------------------------------------------------------------------------------------------------------------------------------------------------------------------------------------------------------------------------------------------------------------------------------------------------------------------------------------------------------------------------------------------------------------------------------------------------------------------------------------------------------------------------------------------------------------------------------------------------------------------------------------------------------------------------------------------------------------------------------------------------------------------------------------------------------------------------------------------------------------------------------------------------------------------------------------------------------------------------------------------------------------------------------------------------------------------------------------------------------------------------------------------------------------------------------------------------------------------------------------------------------------------------------------------------------------------|
| UBQ9 | <p>&gt;UBQ9-TRINITY_DN3285_c5_g1::TRINITY_DN3285_c5_g1_i26::g.107817::m.107817</p> <p>ATGCAGATCTTTGTCAAGACCCTTACAGGGAAAACCATCACTCTCGAGGTTGAGAGCTCCGACACA<br/> ATTGACAATGTGAAGGCCAAGATCCAGGACAAGGAGGGCATTCCCCCGGATCAGCAGAGGTTGATC<br/> TTCGCCGGCAAGCAGCTCGAGGATGGCCGCACCCTTGCCGACTACAACATCCAGAAGGAATCCACC<br/> CTCCATTTGGTGCTTAGGCTGCGTGGTGGCATGCAGATCTTTGTCAAGACTCTTACCGGAAAAACCAT<br/> CACCTTGGAGGTCGAGAGCTCTGACACCATTGACAACGTGAAGGCTAAGATCCAGGACAAGGAGG<br/> GCATCCCCCGGACCAGCAGAGGCTCATCTTCGCTGGAAGCAGCTCGAAGACGGCCGCACACTAG<br/> CTGACTACAACATCCAGAAAGAGTCAACCTTGCACTTGGTCTCAGGCTACGAGGTGGTATGCAGAT<br/> TTTTGTAAAGACCCTTACCGGAAAGACTATCACTTTGGAGGTGGAGAGCGCAAAGATATCCGACACC<br/> ATTGACAATGTCAAGGCTAAGATTCAAGATAAGGAAGGACAGGACAAGGAAGGCATTCTCCGGAT<br/> CAGCAGAGGCTGATATTTGCCGAAAAACAACCTCGAGGATGGTAGAACCTTGCTGATTACAATATCC<br/> AGAAAGAATCTACTCTCCATCTTGTCTCCGTCTTCGTGGTGAATGCAGATATTTGTGAAAACACTT<br/> ACGGGAAAGACCATCACTCTAGAGGTTGAGAGCTCTGACACCATTGACAACGTAAAGGCAAAGAT<br/> ACAGGACAAGGAAGGGATTCTCCGGATCAGCAGAGGCTGATATTTGCCGAAAAATAA</p>                                                                                                                                                                                                                                                                                                                                                                                                                                                           |
| SUR1 | <p>&gt;SUR1-TRINITY_DN7627_c0_g1::TRINITY_DN7627_c0_g1_i9::g.260163::m.260163</p> <p>ATGGAGCACGGAGGTTTCGGAGGCGGCAGGGTGGCGTTTCGAGAGGAACGAGCTGCTCACACTGGC<br/> CGGAGCAGTTACCGTTAGGGGCGTGCTCAACATGGTCATGTCAAATCTCGAAGGAAACGATGCCAG<br/> ACCCGTTATTCCGCTCGGCCACGGCGACCCCTCCGCCTTCCCTTCCCTCCGCAACCACACCTTTTGGCG<br/> AGGAAGCCGTCTGCACCGCCGTCCGCTCCGCCAAGTTCACGGTTACTCTCCACCGTTGGTATCCC<br/> CGCGCTCGCAGCGCCGTAGCAGATTACCTTTCTAAAGACCTTCCTTACAAGTTATCACCCGATGATG<br/> TTTTCTGACCATTGGATGCACCCAAGCATTAGAAGCCATTGTCACTGTCTTGTCTGCCGTCCCGTGCT<br/> AACCTTCTGCTTCCAAGGCCAGGATTTCCTTACTACGAGGCCAGAGCTGGCTTTTCTACTCTTGAAGT<br/> CCGTCACTTTGATCTTATCCCGGAACAAGATTGGGAAGTGGATTGGCTTCGGTTGAAGCTTTGGCCG<br/> ATGAAAACACAGTTGCAATGGTTATTATCAATCCAGGCAATCCGTGTGGAAATGTTTCAAGTATGA<br/> ACACTTGAAAAAGGTCGCGGAGACAGCAAGAAAGCTTGAATCTTAGTGATCGCGGATGAAGTGTA<br/> TGACCATCTTACCTTTGGTAGCAACCCCTTGTCCCGATGGGGGTCTTTCATCAATTGCCCCGATTAT<br/> CACTCTTGGATCAATATCTAAGAGATGGATCGTCCCGGTTGGAGACTTGGCTGGCTTGTCAAAAC<br/> GACCCTGATGGTATCCTTACTAAACATGGGATCGTTGACAGCATTAAAGGTTTCTGAATATTACCTC<br/> TGACCCAGCGACCTTTATGCAGGGGGCAGTTCACAGATTCTTGAGAATACTCCAGCCGACTTCTTT<br/> GAGAAAATTGTAAGTACGCTTAGAGAAAGTGCAGGCATATGCTATGGACACAGCAGAGAAATCCCC<br/> TGCATAACTTGCCCCAGCAAACCTGAGGGATCCATTGTTTGTATGGTAAAGCTCAATCTGTCTCTCCT<br/> CGATGGAATTAAGGATGACTTGACTTCTGCTGCAAGCTTGCCAAGAGGAATCTGTGGTAGTCCCTC<br/> CCAGGTTTTGCTGTGGGGCTCCAGAATTGGTTACGCATTACGTTTGCCATTGAACCATCATCTCTCGAT<br/> GATGGCTTTCTCAGAATTAAGGCATTCTGTCAAAGGCACGCGAAGAAACAATGA</p> |
| YUC6 | <p>&gt;YUC6-TRINITY_DN40249_c1_g1::TRINITY_DN40249_c1_g1_i4::g.257496::m.257496</p> <p>ATGGAGGGGTTTGGTGGTGACGTGGTGCACACGAGCGGGTACAAGAGCGGCACGGTGTATGAAGG<br/> GAAGAGAGTGCTCGTCGTGCGGTGCGGGAATTCGGCATGGAGGTTTGCTTGGATCTCTGCAATCAC<br/> AATGCGAGACCTTCGCTTGTGGTTAGGGATACAGTGCACATTCTACCACGAGAGATGCTGGGGAGAT<br/> CGACTTTCGGGCTGTCCATGTGGTTGCTAAAGTGGCTGCCCATGCGCCTTGTGACCGGATTTTGTCTC<br/> GTCTTATCGTGGCTCGTACTCGGTGATACCGCCCCGTTTTGGCCTCGACCGGCCTCACTTGGGGCCTCT<br/> CGAGCTCAAGAGCCTCTCCGGGAAAAACCCCGGTTTTAGATGTGCGGAACCCCTTGACAAGATCAAAAG<br/> TGGAGACATCAAGATATGCCCCGGGATCCAAAGACTATGGTATAAATCAGCAGAATTTGTGGATGGA<br/> AGAGTGGAAAAATTATGATGCAATAATCCTAGCAACTGGTTACAAAAGTAATGTACCATGTTGGCTAA<br/> AGAAAAGCGAGATGTTCTGTGAGAAAGATGGGATCCCAAAAAGGCCATACCCGAATTGCTGGAAA<br/> GGCGAGTGTGGGCTATACGCGGTGGGGTTACCAAACGCGGCCTTCTTGGGACATCCATTGATGCCA<br/> AGAACATTGCTGCTGATATTGAGGCCTCTTGAAGGAGCAGCAAACCATCTCGCAGTCCAAATACTC<br/> ACCGAATTTTCATGCAAAAACACCTTTAA</p>                                                                                                                                                                                                                                                                                                                                                                                                                                                                                                                                                   |
| VAS1 | <p>&gt;VAS1- TRINITY_DN48214_c0_g1::TRINITY_DN48214_c0_g1_i4::g.78083::m.78083</p> <p>ATGGGTTCTTATGGGATGCTTGCTAAGAGGGCTTTGCTTACTGAAACTCCTGTTATGGTTGAGATGCA<br/> GAAGCTGATCCGAGGCGTGAAAGATTGCGTTTCTCTAGCTCAGGGGGTAGTGTACTGGCTACCACCG<br/> AAGGAGGCACTAGAGAAAGTGAACAACCTTGATGGGAGCCTTCAGTTAGTCGCTATGGTGCCGAT<br/> GAAGGCCTTCCCAGCTGAGAGAGGCCTTAATGAATAAGTTACGGAATGAGAACAAATTAGAGAAA<br/> TCCTCAGTGATGGTAACTGCTGGGGCAAATCAGGCTTTTGTCAATATTGTGCTTACACTATGTGATGC<br/> GCAAGATAGTGTTGTCATGTTGCGGCCATACTACTTCAATTCATACATGTCGTTCCAAATGACTGGAG</p>                                                                                                                                                                                                                                                                                                                                                                                                                                                                                                                                                                                                                                                                                                                                                                                                                                                                                                                                                                    |

|        |                                                                                                                                                                                                                                                                                                                                                                                                                                                                                                                                                                                                                                                                                                                                                                                                                                                                                                                                                                                                                                                                                                                                                                                                                                                                                                                                                                                                                                                                                                                                                                                                                                                                                                                                                                     |
|--------|---------------------------------------------------------------------------------------------------------------------------------------------------------------------------------------------------------------------------------------------------------------------------------------------------------------------------------------------------------------------------------------------------------------------------------------------------------------------------------------------------------------------------------------------------------------------------------------------------------------------------------------------------------------------------------------------------------------------------------------------------------------------------------------------------------------------------------------------------------------------------------------------------------------------------------------------------------------------------------------------------------------------------------------------------------------------------------------------------------------------------------------------------------------------------------------------------------------------------------------------------------------------------------------------------------------------------------------------------------------------------------------------------------------------------------------------------------------------------------------------------------------------------------------------------------------------------------------------------------------------------------------------------------------------------------------------------------------------------------------------------------------------|
|        | TGACTAACATTCTGGTGGGGCCCCGGTGATCCTGATACCCCTTCATCCAGATGCAGACTGGTTAGAAAA<br>GAAGTTACAAGATACAATACCAACTCCGAAGCTTGTAAGTGTGTAATCCTGGTAATCCGTCGGGA<br>ACCTACATCCCTGCACCTCTTCTTCAGAGGATATCAGATATTTGCAAAAAAGCTGGATGTTGGCTTGT<br>AGTTGACAACACCTACGAGTACTTCATGTACGATGGTCGAAAACACGTGTGCATTGAGGATGATCAC<br>ATAGTCAACATATTTTCTTCTCTAAAGCTTATGGGATGATGGGATGGAGAGTCGGATATATAGCGTAC<br>CCTTCAGAAGTCAAAGGCTTAGCTGAGCAACTCCTCAAGGTGCAAGACAACATTCCCATCTGTGCTT<br>CCATAATATCCCAACAACCTGCGCTTCACTCCCTCAATTTGGGACCGAAATGGGTACCCAGTCAAGT<br>TCAAACCCTCGTTGCCAACAGAGGGCTTCTTATAGACGCGCTGTCCCCATTAGGTAAAACTCGGTT<br>AAAGGTGGAGAAGGCGCGATCTACTTGTGGGCGAAGCTCCCCGACAAGTACGAGGATGACTTTGCG<br>GTCATTAGTTGGCTGGCCAAGAAGCATGGGGTCGCACTGATACCCGGTAGCTCCAGCGGGTGCCCC<br>GGATACGTGAGGATCTCGTTCGGGGGGCTAGTTGAAGAGCAGTGCCGGGAGGCGTCAAAGAGGCTC<br>AAGAAAGGGCTACAACAACCTGGTAGATGAAGGCATGGTTTGA                                                                                                                                                                                                                                                                                                                                                                                                                                                                                                                                                                                                                                                                                                                                                                                                                                                                                                              |
| CYP79B | >CYP79B2-TRINITY_DN122_c2_g2::TRINITY_DN122_c2_g2_i1::g.120149::m.120149<br>ATGGATTATTTCTGGATACTTTTTGCGTTACTATATGCAGCTGCAGTATCCGTCGTCTCGAAAAATAATC<br>AAAATTCCAAGCCAACCAAAATCGAAAAATCCCACCAGGTCCAAAACCATGGCCTGTGATAGGCAAT<br>TTGAACCTTCTTGGCTCAATCCCACCACATCAAGCCCTTACCTTTTGTCCCAAAAATATGGCGAAAT<br>TATGCAGCTGAAGTTCGGAAGTTTCCGGTAGTGGTTGCATCATCGCCCGAGATGGCCAAACAGTTC<br>CTAAGGGTACATGATGCGAGCTTCGCCTCTAGGCCCTTCTTGCAGTTGGTAAATACACCAGCTACA<br>ATTACTCGGACCTAGTATGGGCCCCATACGGGCCATACTGGCGCCAGATTTCGTAGAAATTTACTTCTGG<br>GAGGTGTTCAGTGCTAAAAAGCTCAAGCTCTACGAGAAGGTACGTGCTGATGAGAGGCAGCGTTTC<br>CTGTCTTCCATACGTGCCCTGGCTGGGAAGCCTATCGTGCTCAAAGATCATCTGTCACGTTACAGTTT<br>GATGACTATATGGAAGATGCTATCAAAAGATGAATATTTAGCGAAACAAAGGGGGGAAACTCTGTT<br>CTAAATATGGATGAATTGCATGAGATGGTGGATGAGTGGTTTATGCTCTCTGGAGTTTCAATATCGG<br>GGATTGGATTCCATGGCTCAGTCCATTCGATCTGCAGGGATACGTAAAGAAGATGAAGGATTTGAAC<br>AAGAAATGGACAAGTTTACAACCTATGTGATCGATGATCATATAGCTAGAAGAGCTGCAGAGAAAA<br>GACGAATGTGCCCCGATGGATTTGTAGACACTTTGCTGCAGATGGCTGAGGATGGTAAGGTTGAAG<br>TTGCGATCACAAGGGATTGTGTGAAGGCACTGATACAGAATTTAATAGTTGGTTCCATGGATACGTCA<br>GCCACAATGATCGAATGGGCAATACACGAAATCTTGAGACAACCGCACATAATTGAAAAGGCGAAA<br>GCAGAGCTAGACAGGGTGATCGGAAGAAGCAGTATGGTAGGAGAAAAACGACTTCTCTCGACTGCCT<br>TACTTAGACGCCATTGTGACGGAGACGTTTCAAGGCTCCATCCAGTAGGCACGATGCTAGCCCCCTCATT<br>ACGCGATACAAGACTGCAACGTGCGAGGCTACGACATATCAAAAGGGACGACGGTGTTTGTCAACG<br>TATGGAGCATAGGCAGGGATCCTAGGGCGTGGGACTCGCCTGAGAAGTTCTCGCCTGAGAGGTTTCT<br>GGGCAAGGAACTGATGTGTTGGGAGGCAATTTGCGTTGCTGCCTTTTGGCTCGGGCAGGCGGATG<br>TGCCCCGGATACAACCTCGGACTTAAGGTTGTTGCAACAACGTTGGCTAATTTGTTGCATGGATTGA<br>CCTGAAACTGATCGATGGCATGAGGCCTCAAGATGTATCGCTCGAAGAAGAGTATGGACTCACCAC<br>GCATCCTAAACACCTCCTTTCCTTACTCATGGAACCTACTTTGCCATCACATCTTTACTAA |
| AMI1   | >AMI1-TRINITY_DN9579_c0_g1::TRINITY_DN9579_c0_g1_i4::g.62111::m.62111<br>ATGGCTAGCAGCTTATCATCAGTAGCAGTAGCAGATTATGGAGCATTATGGAGAAATCACTCTGCT<br>TCCTCACTCTTCTCTCATGAGCTTCCCCTTTCTGGCCTTAAATTTGCTGTGAAAGACATATTCGACGT<br>GGAGGGTCATGTACGGGTTTTGGGAATCCGGACTGGGCGAGGACTCACTTGGCTGCTACAGAGAC<br>TGCCCCGGCTGTGCGGTCTATGCTTGAGGCAGGTGCAACTTGTGTTGGCAAACTGTGATGGATGAA<br>ATGGCTTACAGCATAAATGGAGAAAATGTGCATTACGGGACTCCAAGAAATCCATGTGCACCAGATA<br>GAGTGCTTGAGGCTCTTCCAGTGGATCTGCTGTGCGAGTTGGAGCAATGCTTGCAGATTTCTCCTTA<br>GGTACTGACACTGGAGGAAGTGTGAGAGTTCCAGCATCATACTGTGGAATCTATGGCTTCCGCCCCCT<br>CTCATGACCTCGTCTCAACATCTGGTGTACATCAATGGCTCAGAGTTTGGACACAGTCGGCTGGTTT<br>GCTAGAGATCCGGTGATCTTGAAGAAGGTGCGAAAAGATTCTGCTACAACCTGCGGGATGATAATCCTA<br>CTACACTTGATCAACTATTGTTGCAGAAGATTGCTTCGACCTCGTAAACATCCCTCCTCATCAGCTC<br>AAAGATGTTCTCACCAGCTCCGTGGAGAAATTATATGGAAGTCAGATAATACGATACATGAATCTAG<br>GGGACTTAATTGAAACCAAACCTCCCAAATCTGAAGGTTTTTATGAACAACAATGTTGGCACACAGA<br>AGGATAATATACCATCATTAGCAGCTCTATCAACCGCCTTGAGATCGCTTCAAAGGCATGAGTTCAAG<br>AGAATCATGGCGAGTGGGTTGAGTCAGTTAAGCCTAGTTTAGGCCCGGCATATACGAACGAGTCT<br>GGGAAGCTATCAGATCAACGGATGAAAATATAGACGTGTGTCGTTCCCTGCGTGGCGAGTTACGTGC<br>AGCTCTCGCTGATCTATTGGGGGATTCCAGGATCCTGGCAATCCCTACGGTACCGGGGCTCCACCG<br>GAGTACAAATGGATCCAACGACACTGGAGAGTTTTCGTGCCAAGGCCTTACGCTTGCTATCAGTAT<br>CCGGCGTGTCCGTTTTGTGCCAGGTGAGCATACCGTTAGGCATGTACAATGATCTCCCGGTTGCTGTT<br>TCTCTGCTGGCGAAACATGGCTCGGATGGATTCTTGCTTAGTTTTGTTGAGACTCTTCACAAAGCTCT<br>CAAAGAGGAGGGCATGCTTCTTGA                                                                                                                                                                                                                                                               |
| TGG1   | >TGG1-TRINITY_DN79384_c0_g1::TRINITY_DN79384_c0_g1_i8::g.16615::m.16615                                                                                                                                                                                                                                                                                                                                                                                                                                                                                                                                                                                                                                                                                                                                                                                                                                                                                                                                                                                                                                                                                                                                                                                                                                                                                                                                                                                                                                                                                                                                                                                                                                                                                             |

|         |                                                                                                                                                                                                                                                                                                                                                                                                                                                                                                                                                                                                                                                                                                                                                                                                                                                                                                                                                                                                                                                                                                                                                                                                                                                                                                                                                                                                                                                                                                                                                                                                                                                                                                                                                                   |
|---------|-------------------------------------------------------------------------------------------------------------------------------------------------------------------------------------------------------------------------------------------------------------------------------------------------------------------------------------------------------------------------------------------------------------------------------------------------------------------------------------------------------------------------------------------------------------------------------------------------------------------------------------------------------------------------------------------------------------------------------------------------------------------------------------------------------------------------------------------------------------------------------------------------------------------------------------------------------------------------------------------------------------------------------------------------------------------------------------------------------------------------------------------------------------------------------------------------------------------------------------------------------------------------------------------------------------------------------------------------------------------------------------------------------------------------------------------------------------------------------------------------------------------------------------------------------------------------------------------------------------------------------------------------------------------------------------------------------------------------------------------------------------------|
|         | <p>ATGGCAACTCTAACTCACTCGCTCTATCTTCTCTTAGTCATCGCTCATTCTTAATTTCTGCGAATGCC<br/> ACATCGAGATCCACATGTGACTGCGGCGCCACGTCGTCTTCGTCGATCGGCCGTGGAACCTTTCCAG<br/> AAGGATTTGTCTTCGGGGCAGCAGCATCAGCTTATCAGTACGAGGGTGCTGTAAAGGAAAACGGGA<br/> AAGGGCAGAGCTTGTGGGACAATTTACGCACGTTTATCCAGAAAAGATTAAAGGATCATAGTAATGG<br/> GGACATAGCCATCGATTCTATCATCTGTACAAGGAAGATGTAAGGATTGCAAGAGATTAGGTCTC<br/> GACGCCTATCGAATCTCGATATCATGGCCAAGGATCTTGCCAGGTGGAAGATTGAGGCAGGTGTGA<br/> ATCAAGATGGCATTGACTATTACAACAATCTAATTGACGAACTCCTTGCTAATGGTATAGAGCCTTTT<br/> GTGACCTTACTCCATCTTGACGTTCCCCAAGCTCTACAAGATTATATGGTGGATTCTATCTTCTCAA<br/> ATTGTGGGTGATTTTCTCAACTTTGCAAACCTCGTTTTCAAGCAATTTGGTGACCGTGTCAAGTATTG<br/> GGTCACTATAAACGAACCGTGGACTTTCAGCGTGTATGGCTACGCCTACGGCGTTTTTGACCCGGC<br/> CGATGCTCGGAGTGGCAGGATCTCAATTGTACGGGTGGGGACTCTGCCACGGAGCCGTATATCGTGG<br/> GACACAATCTTCTCTAGGTCAATTCTGCTGTTGTTAATTTGTACCGGGAAAAGTATCAAGTATCGCAG<br/> AAAGGAAAAATCGGTATAGTTTTTGACGATATTGGTTGAGCCGTTTCGATGAGACGAATGAGAAATG<br/> AGAAAGCTAAGGATCGAGCCATGGACTTTATGCTTGGATGGTATATGGAACCACTGACACATGGAAG<br/> CTACCCAGAAAAGTATGAAAATTCGAGTCAAGGAAAGATTACCTAAATTCGAGGAAAATGAGCTTAA<br/> CATGGTTAAGGGGTCTTTGACTTCATAGGGTCAACTACTACGGTGCCATTTATGCGGTGACAAAAC<br/> CTAACTCGACTAGCTGCAGTTACGCGACAGACTCTGAGATGGTGATCACAGGGACCAAAAATGGAA<br/> AGCCAATAGGAGAACAAAGGAAGAAATTCAAGCAAGCTCTACATTTATCCAAAGGGACTTCGCCAAA<br/> TTCTCAAATAATAAAACAAAATTACAATAATCCACAGATTTACATCACGGAAAATGGGCTTGATGA<br/> GGCAAGAAACGACACGTTAGAACTATCCGAAGCCTTACAAGACAACATGAGGAAAGACTACATTC<br/> AGCATCATCTCTGCTGTCTGAGTGAAGCAATTCGGAAGATGATGCAAATGTGAAAGGATATTTGT<br/> ATGGTCATTGGTGGATAATTTGAGTGGGCCGGTGGATTTTCAGTTCGATTCCGACTAAATTATGTGG<br/> ATTATAGAGATGAATTGTTGAGAAGATCCTAAGATTTCTGCCCTTTGGTTCAAGAATTTCTATTGA<br/> AGACAACCTGGTCACAGTGA</p> |
| NIT1    | <p>&gt;NIT1-TRINITY_DN62_c0_g1::TRINITY_DN62_c0_g1_i15::g.155056::m.155056<br/> ATGAGCTCAGTGTCGACGTCATCATCGCCTGCTCCGAACAGTCAAATCTGAATAGAAATCAACGG<br/> CAGAAGAAACAGCAGCAGTTGCTGAGAAGCGCAGAGACATGGCTCTAGTTCCTAATCCTGCTGTTG<br/> ACGACGGCCCTTTGTTTGCCGAGGTGGACATGGGGGCCGACGTCTCCGCTACCACTGTCCGCGCCAC<br/> GGTCGTCCAGGCCGCCACCGTCTTCTATGACACCCCGCCACTCTTGATAAAGCTGAAAAGTTGCTG<br/> GTTGAAGCAGCCTCATATGGTTCTCAGTTAGTTGTGTTTCTGAAGCGTTTCATTGGTGGCTATCCACGT<br/> GGATCAACTTTTCGGTGTTCATTGGTAACCATACAGCCAAGGGTAGAGAGGAGTTCGGGAAATACC<br/> ATGTTGCTGCTATCGATGTTCTGGTCTGAAGTTGATCGTTTAGCTGCCATGGCCGCAAAATATAAG<br/> GTTCAATTTAGTGATGGGGTTCATCGAGAGAGATGGATATACCTTATACTGCACTGTCTGTTTTTCGAC<br/> TCTCAAGGTCAATTCCTCGGAAAGCATAGGAAAGTCATGCCTACTGCTCTCGAGCGCATCATCTGGG<br/> GTTTTGGAGATGGCTCGACAATTCCTGTTTTCGACACGCCTATTGGCAAAATCGGGGCTGCAATCTGT<br/> TGGGAAAACAGAATGCCACTTTTGAGGACAGCAATGTATGCTAAAGGGGTTGAGATCTATTGTGCGC<br/> CTACGGCTGATTCAAGGGATGCTGGCAAGCTTCGATGACACATGTTGCCCTTGAAGGAGGGTGTTC<br/> CGTGCTCTCTGCCAGCCAGTTCTGCAGAAGGAAAGACTACCCGCTCCACCGGATTATGTTTTCTCC<br/> GGTGCGGAGGAAGAAGTCATGCCGAATCCATTGTCTGTGCTGGCGGCAGTGTCAATTTCTCCGT<br/> CTGGGGCTGTGCTGGCAGGGCCGAATTATGAAGGGGAAGCACTCATATCCGCGGATTAGATCTCGG<br/> CGAGGTGGTTCGTGCAAAGTTTCGACTTGTATGTGGTCGGCCACTATGCACGCCCTGAAATCCTCAGC<br/> CTCGTCGTGAAGGACCACCCCATGACCCCGTATCCTTCACTTCAGCATCTGGCAAGGCCGAAAGCT<br/> CCAGAGGGCGACCTGACGTTCCCTAA</p>                                                                                                                                                                                                                                                                                                                                                                  |
| UGT74B1 | <p>&gt;UGT74B1-TRINITY_DN32215_c0_g1::TRINITY_DN32215_c0_g1_i1::g.92470::m.92470<br/> ATGGAGAAATCAAACCAACCTCACGTCATAGTCTCCCGTATCCGAGCCAAGGCCACATCAACCCCT<br/> CTCCTCCAGTTCGCCAAGCGCCTCGCCGCCAAGGGCGTCCGAGCCACCCTAGCCACCACCGCCAAC<br/> ACCATGCAGTCCGTCCACGCCGCCGCCGTGCGGGTAGCCCCGATCTCGGACGGCGGGCGGTTCGCC<br/> AAAGCAGGCAAGGAAGGGGATTACCTCAGCGCAATTCGAGAGCACGGCTCCAAATCCCTATCTCGA<br/> CTCCTCGACAGCTACAAAGCCCGCGCATCCCCGTGAGTGCCTGATCTACGACTCCTTCTTCCCGT<br/> GGGCGCTCGACGTCGCCCAGCGGCACCGCTACTGGGGGCGGCGTTCTTACCAACTCCGCCGCCG<br/> TGAGCGGATCTTACGCCACATTCACCGCGGCACGCTGACGCTGCCGGTGTATTTGACGATGCGCC<br/> TCTGGTATTGCCTGGTCTGCCGCCCTTGAACCTTTGCGACGTTCCGAGCTTCATCAAGAAGCCTGAG<br/> AGTACCCGGCATACTTGGCTATGAAATTGAATCAGTTTTCCAATCTGGAAAAGCGGATTTCGTCTT<br/> TGCTAACACTTTCCAAGAACTAGAACGACAGGAGGCGAAAAGCGTGGAGAAGTACTGGCCGGCGA<br/> AGCTGGTGGGGCCGCTGGTGCCGTACGCTATCTGGACGGTAGAATCGAAGGAGACAAGGGGTACG<br/> GCGCCAGCTTATGGATGCCGCTGAGAGAGCAATGCGCGGCTTGGCTCAACACCAAGCCGAGGAAT<br/> CAGTGATCTACATCTCGTTCGGGAGCATGGTTTCACTCACTTCGAAGCAGATGGAGGAGATGGCGTG<br/> GGCGGTGACGTCGAGCACCTCTACTTCTCTGGGTGCTGAGGGAAACCGAGCTCGACAACTCCC</p>                                                                                                                                                                                                                                                                                                                                                                                                                                                                                                                                                                                                                                      |

|      |                                                                                                                                                                                                                                                                                                                                                                                                                                                                                                                                                                                                                                                                                                                                                                                                                                                                                                                                                                                                                                                                                                                                                                                                                                                                                                                                                                                                                                                                                                                                                    |
|------|----------------------------------------------------------------------------------------------------------------------------------------------------------------------------------------------------------------------------------------------------------------------------------------------------------------------------------------------------------------------------------------------------------------------------------------------------------------------------------------------------------------------------------------------------------------------------------------------------------------------------------------------------------------------------------------------------------------------------------------------------------------------------------------------------------------------------------------------------------------------------------------------------------------------------------------------------------------------------------------------------------------------------------------------------------------------------------------------------------------------------------------------------------------------------------------------------------------------------------------------------------------------------------------------------------------------------------------------------------------------------------------------------------------------------------------------------------------------------------------------------------------------------------------------------|
|      | GGCCGGATACACGGAATCCGTGAAGGGGAAGGGGTTGATCGTGTCTGCTGGTGCAACCAGCTGGAGAC<br>GCTGGCCCATCCGGCCATTGGCTGCTTTGTGACGCACTGCGGGTGGAACCTCGACACTGGAAGGGCT<br>GGCGCTGGGGGTGCCGATGGTGGCGCTGCCTCAGTGGGCAGACCAGATGACGGATGCCAAGTTCAT<br>AGAGGGGGTATGGGGGTGGGGTTAGGGCTAAGGAGGATGAGTTGGGGTTGCAGGGAGGGAAG<br>AGCTTCTTTATTGTTTAAAAGAAGTGATGGAAGGAGAGAGGAGAGAGAAGATGAGGAGCAATGCA<br>AGAAAATGGAGGGAGTTGGCAATGGAAGCAAGTGATGAAGGGGGTAGCTCAGACAATGCCATCAA<br>TCAATTTGTGATGAAATTGATGGTCACTACAACAGTAGAAAAATTAG                                                                                                                                                                                                                                                                                                                                                                                                                                                                                                                                                                                                                                                                                                                                                                                                                                                                                                                                                                                                                                                                   |
| TAA1 | >TAA1-TRINITY_DN3649_c1_g1::TRINITY_DN3649_c1_g1_i4::g.2665::m.2665<br>ATGGTTATGGAGCTTAGAGCGATGGTTTTGGGGCACTTTTTGGTGGTTTCTTTGGCCTTGAACGTGGG<br>ATTGTTGTACAGAAGCTACTGCAGCGGCAACACAAATCCCAAAACGTCTTCAGCTTCAACAATGA<br>GTGCAAGAACTCATCTTTGCTCCCAATAGGGAAGCCCATGTTGCTCAAAAGGCGTTTCTCTGAACT<br>AAATTTCAATCCTCAAAAGCAGCTGCTCTGAGTGAAGTTATCGATCTCGATCATGGTGATCCGACAAT<br>GTATGAGAGATATTGGCAGCAGATGGGGGATCGAACTACGGTTGTGATCCCGGGTTGGAAATTCATC<br>AGTACTTCTCTGATGTGAGGAGCCTTTGCTGGTTTCTTGAGCCGGAATTTGCAAATGCAGTGGGTAG<br>ATTGCACAAACTGGTGGGAAATGCCGTCACTGATGGCCGTTATATTGTCGTTGGGACGGGATCCACG<br>CAGCTGTTCCAGGCTGTGCTCTATGCTGTTTCCCCCTTAATGCCTCGGAGCCAATCAGTGTGGTGTC<br>TGCTGCCCCGTTCTACTCTTCGTATCCTCTGATCACCGAGTTTCTCAAGTCGGGGCTCTACAAGTGGG<br>GCGGCGACGCGCACGAGTTCAAGAGGGATGTTCCGTATATCGAGCTGGTGACGTCGCCAAACAACC<br>CCGATGGATTGTCAAGAGAGGCCGTGGTGAATCGGAATCAAGGGATACTCGTCCACGACCTCGCTT<br>ACTACTGGCCTCAATACACCTCTATCTCGTCTCCGCCTGCAGATCACGACATCATGCTGTTTACGGTC<br>TCCAAAAGCACGGGCCATGCTGGAACGCGCTTGGGGTGGGCTCTTGTAAGGATCAAGAAACCGC<br>GAGGAAGATGACCGAGTTCATCGTGCTCAGCACCATTGGCGTCTCGAAAGAGTCACAGCTACGCGC<br>AGCCAAGATTCTGCAGGTCCTATCAGACTCCCATGAGCATCGGGGAGTTTCAAGGAAGGCGAAGC<br>CTTCTTCGAGCACAGCTACCATCTCATGAAAAGAGGTGGAAGCAGCTGAGAGAGGCAGTGAAGA<br>AGAGCAAGCTCTTCAGCTTGCCTGTGTTCTCCATGGCAAGTGCGCGTTTCACTGGTCGCACCTTCAC<br>CTCACAGCCAGCTTTCGCGTGGTTGAAGTGTGAGGGCGAAACAGAGGACTGTGAGGGATTCTCTCCG<br>TGACCACAAGGTGCTAACGCGTAGCGGGAAGCACTTTGGTGACAGCGGAAGTACGTGAGGATCA<br>GCGTCTGCCACGTGATGAGGTTTTCGACCAGTTCACGGAGCGATTATCTAGCATCACGACTTTGCC<br>GTCATCCACATAG |
| YUC1 | >YUC1-TRINITY_DN26766_c0_g1::TRINITY_DN26766_c0_g1_i3::g.90152::m.90152<br>ATGGCGGCAGTGACGATCATCGGCGGCGGCCCTCCGGCTTGGCGACGGCGGCGTGCCTCCACCGC<br>CTCTCCATCCCATACACACTTCTAGAGAGAGAAGACTGCGTCGCTCCTCTGTGGCAAAAGTACACCT<br>ACGATCGGGTGACCTGCACCTACACAAACAATTACGCCACCTGCCGTTTCATGCCTATTCCAAGTTC<br>TTACCCCAAATATCTATCAAGGAACGACTTCATACGCTACCTCAACGAGTACGTTGGGACCTTCGCC<br>ATCCGCCCCGCTACCTTAGGGCTGTGGAGGCGGCGGTATACGACGCGGCGGCGGGAATTGGACG<br>ATCGAATCGAGGAATTTGGCCACCGACGAAATTGAGAAATACAGATCGAGGTTTCTGGTCTGCTGCTA<br>CCGGCGAAACGTGCGATCCTAGGGTTCTGAGATCGAAGGTTTGGGGAGTTTCGCCGCGGAGGTGC<br>TGCATTCGACCAGGTATAAGAACGGTGAGAGGTTTACCAGGAAAAATGTGTTAGTCGTTGGAAGTG<br>GTAATTCGGGCATGGAATCGCGCTCGATCTTGCCAACTCCGGCGCCAAAACCTCCGTCGTTGTGCG<br>AAGTCCGATTCAATACTATCGCGAGAGATGATGCATCGGGAGCCTCCCTGGTGAAGCATCTGCCTT<br>TCGACTGGGTTGACTCATTGGTGACGCTGATGAGCAAGGCCGTGTTGGAGACTTATCAAAATACGG<br>AATTCAAAGGCCCAAAGAGGGCCCTTTTACATGCAAGGCTAAATACGGAAAATACCCAGTTCTTGAT<br>GTTGGAACATGGGACAAGATCAAGTCCAGGGATATTAAGGTGTTGCCGGGAATAAGCTGCATAAAG<br>GGCAATAAGGTCTTTTTTCGAGAATGAAGAGGAACAGCTCTACGACGTGATTGCTTGGCCACAGGCT<br>TCAAAAGCTCCGTCAAACAGTGGCTTAAGGGAGACGATTGTTTATTAATGAAAATGGGCTGGCAA<br>ATGCAAAAAAATTGGAAGGGTGAAAACGGGCTTTATTGTGTGCGGGCTGGCCGGCAGAGGGCTTTATG<br>GAGCAGCTATGGAGGCCCAAAGCATAGCCCAAGATATCAACACTCTACTATTCTAG                                                                                                                                                                                                                                            |
| AO1  | >AO1-TRINITY_DN14468_c0_g5::TRINITY_DN14468_c0_g5_i1::g.208985::m.208985<br>ATGGGTTCTTTGATGAGAGAGAATGAAATGGAGAGAGTAGATGCAGAATCTCAATTTGAATTAAAGG<br>AAGCGATTCTGTACGTTAATGGAGTCCGTCGAGTTTTCCTGATGGCTTAGCCCACTTACCCTTCTC<br>GAATATCTCAGAGATATGGGCCTCACTGGTACAAAACCTGGTTGTGGTGAAGGAGGTTGCGGGGCAT<br>GCACGGTGATGATTTCTATCTTGACCAAACTCGAAGAAATGTGTGCATCTTGCTATTAAACGCATGC<br>TTGGCTCCATTGTATTCTGTTGAAGGAATGCATGTAATTACAGTTGAGGGTATTGGTAGTTGCAGATAT<br>GGGTTACATCCAATACAGGAATCATTGGCAAATTCACATGGCTCACAATGTGGTTTTTGACCCCTGG<br>TTTTGTTATGTCTATGTATGCCCTGCTAAGATCATCTGAGAAACCACCCACAGAAGAGGACATCAAA<br>GAAAATCTTGCTGGAAATTTATGTGATGTACAGGTTATAGACCGATAATTGATGCTTTTCGTGTATTT<br>GCGAGAAGAGATGATGCCTTGACACAATTCGATCCTCAGACCTTCGAGCAGTGAATTTGTTGCC<br>CATCAACCGGTAAGCCATGTTTCATGCGGACAGAATATTAAGGATGATGAAGGAACCTACCACAAGAA                                                                                                                                                                                                                                                                                                                                                                                                                                                                                                                                                                                                                                                                                                                                     |

|  |                                                                                                                                                                                                                                                                                                                                                                                                                                                                                                                                                                                                                                                                                                                                                                                                                                                                                                                                                                                                                                                                                                                                                                                                                                                                                                                                                                                                                                                                                                                                                                                                                                                                                                                                                                                                                                                                                                                                                                                                                                                                                                                                                                                                                                                                                                                                                                                                                                                                                                                                                                                                                                                                                                                                                                                                                                                                                                                                                                                                                                                                                                                                                                                                                                                                                                                                                                                                                                                                                                                                                                                                                                                                                                                                                                                                                                                                                  |
|--|----------------------------------------------------------------------------------------------------------------------------------------------------------------------------------------------------------------------------------------------------------------------------------------------------------------------------------------------------------------------------------------------------------------------------------------------------------------------------------------------------------------------------------------------------------------------------------------------------------------------------------------------------------------------------------------------------------------------------------------------------------------------------------------------------------------------------------------------------------------------------------------------------------------------------------------------------------------------------------------------------------------------------------------------------------------------------------------------------------------------------------------------------------------------------------------------------------------------------------------------------------------------------------------------------------------------------------------------------------------------------------------------------------------------------------------------------------------------------------------------------------------------------------------------------------------------------------------------------------------------------------------------------------------------------------------------------------------------------------------------------------------------------------------------------------------------------------------------------------------------------------------------------------------------------------------------------------------------------------------------------------------------------------------------------------------------------------------------------------------------------------------------------------------------------------------------------------------------------------------------------------------------------------------------------------------------------------------------------------------------------------------------------------------------------------------------------------------------------------------------------------------------------------------------------------------------------------------------------------------------------------------------------------------------------------------------------------------------------------------------------------------------------------------------------------------------------------------------------------------------------------------------------------------------------------------------------------------------------------------------------------------------------------------------------------------------------------------------------------------------------------------------------------------------------------------------------------------------------------------------------------------------------------------------------------------------------------------------------------------------------------------------------------------------------------------------------------------------------------------------------------------------------------------------------------------------------------------------------------------------------------------------------------------------------------------------------------------------------------------------------------------------------------------------------------------------------------------------------------------------------------|
|  | <p>GCATCTGTAACAGTGACATTCTGAAGCCAATCTCTTATAACGATACTGATGGAGCTGCATACACTAGC<br/> AAAGAGCTTATCTTCCCTCCAGAGCTTCTAATGAGGAAATCAACTGCTTTATGCTTGACTGGGTCTAA<br/> TGGCCTTAAGTGGCATCGTCCAGTAAGCCTTCAGCATGTATTTGATATAAAAGCAAAATACCCTAATG<br/> CCAAATTAGTTGTTGGTAACACCGAGGTGGGAGTTGAAACAAGGCTAAAAAATTTCCACTATCCAGT<br/> TCTTGTCCATGTTGCTCATGTGCCTGAACCTAATAAATTGAACATAAACGATGAAGGATTGGAGATTG<br/> GTGCAGCAGTTAAACTTTCAGAACTTGTCAAAGTACTAAAATTAGTTATAGACCAGCGTGCTTCTTTT<br/> CAAACCTCATCGTGCAGAGCTATCCTTGAACAGTTAAAATGGTTTGCTGGGACACAAATAAGAAATA<br/> CTGCATCTGTTGGTGAAAATATTTGTACAGCTAGTCCTATATCAGACCTCAACCCTCTATGGATGGCTG<br/> CTGGAGCGAAGTTTCACATTTCCGATTGTAAAGGAAACATAAGGATATGTGAAGCAGAATATTTTTTC<br/> CTGGGTTATCGTAAAGTTGATCTGGCAAGTAATGAGATACTTCTTTTATTTTTCTCCCTTGAATTCTC<br/> GATATGAATTTGTGAAAGAATTTAAGCAAGCTCATAGGAGAGATGATGACATAGCCATTGTGAATGC<br/> TGAATGCGCGCCTGTCTTGAAGAGAAGGACCAGAAATGGATACTTTCTGATGCATCAATTGTTTAT<br/> GGGGTGTTGCTCCTTATTCTATTTCTGCAAATGAAACAAAGAAGTTTCTGCTAGGGAAGCATTGGA<br/> ACAAGGAGTTGTTTCATGGTCTCTAGAAGTACTGGAGAAGGACATTATCCTGAAAGATGGGGCTCC<br/> AGGGGGGATGGTGGAGTTTCGGAATCTTTAATTCTGAGTTTTTCTTCAAGTTTTTCTTGTGGGTTTC<br/> TCACCAGTTGGATGGATTGTCAAGTTCCAACGGAACAGTACCGACATCTTATCTTTCCACAATAAAAT<br/> CTTTTCACTATCCTTCTACTATAGGAAGACAGCATTATGAAATTGTAAAACGTGGGACTGCTGTTGGA<br/> GCTTCTGAAGTTCATCTTCTTCAAGGCTGCAGGTTACAGGAGAGGCTGAGTATACAGATGATGCTCC<br/> TATGCCTCCTAATGGTTTACATGCTGCATTAATATTGAGTAAGAAGCCTCATGCACGTATACTTGCAAT<br/> TGATGATATTATGGCGAAATCTTCTCCGGGGTTTGCAGGAATTTTTTGGCAAAACATGTGCCAGGGA<br/> TCAATATGGTTGGACCAGTTGTTGTGGATGAAGAACTTTTTGCTTCAGAAGTAGTCACATGTGTGGGT<br/> CAGGTTATTGGGGTGTTGTGGCTGATACACATGAAAATGCAAAGCACGCCGCCCGGAAAGTCCAC<br/> ATTCAATATGAAGAACTACCAACAGTCTTATCTATTGAAGAAGCTATTGCATCTAACAGTTTCCACCC<br/> AGAACTGAAAGGTGCCTGAGGAAAGGTGATGTGGACCTCTGTTTCTTGGCAGGGCAGTGTGATAA<br/> TATAATTGAAGGAGCAGTTCAGGTAGGTGGTCAGGAACATTTCTACTTGGAGCCAAATAGCACTTTA<br/> GTATGGACTATTGATGGTGGAATGAAGTTCATATGATCTCATCTACTCAAGCCCCTAAGAAACACCA<br/> ACAGTATGTTGCCCGTGTCTTGGTCTTCCGATGTCAAAAGTTGTATGCAAGACTAAAAGAGTTGGTG<br/> GTGGATTGGAGGGAAGAAACCAGGTCTGCTTTCCTTGCTGCTGTGGCTGCCATTCCATCATATTTA<br/> CTAAATCGTCCAGTAAAGATTACACTCGATAGGGATATTGACATGATGATAACAGGACAACGCCATA<br/> GCTTCTTGGGAAGTATAAGGTTGGTTTTACAAATGATGGAAAGATACTTGCTTTGGATCTTGAGATC<br/> TTCAACAATGGAGGAAACTCACTTGATCTCTCACTTGGGTGCTTGAACGTGCCATGTTCATTAG<br/> ACAATGTATATGAGATTCTAATGTTAAGGTCAAAGGAAAGGTCTGCTTAACAAATTTGCTAGTAAT<br/> ACTGCTTTCGGAGGATTCGGTGGTCCACAAGGTATGCTGATTGCTGAAAACCTGGATTCAAAGAATAT<br/> CCATGGAACCTAAGAAAAGCCCAGAAGAGATTAGGGAGAGGAATTTTCAGAGAGACGGTTCCGTG<br/> TTGCATTATGGTCAAAAAATTGAAAACCTGCACCCTGGAGCGCCTCTGGAACGAACTCAAGACATCA<br/> TCTGACTTTTTAGCCGTTAAAAAAGAAGTGGTGCAGTTCAATACTCATAATAGATGGAAGAAGCGTG<br/> GAGTGGCTATCGTCCCTACAAAATTTGGCATATCTTTTACTGCAAAATTTATGAATCAGGCAGGTGCA<br/> CTCGTCCATGTTTATACAGATGGAACCTGTGTTAGTTACACATGGGGGTGTTGAGATGGGGCAGGGTTT<br/> GCATACAAAAGTGGCACAGGTGGCTGCGTCTCTTTCAACATTCCTCTGAGCTCCATTTTTATATCAG<br/> AGACAAGTACAGATAAGGTTCCAAATGCATACCAACGGCTGCTTCTGCAAGTTCTGATATATATGG<br/> TGCTGCAGTTTTAGATGCATGTGAGCAAATAAAAGCACGCATGGAACCTATAGCATCAAAACATAAT<br/> TTTGCTCATTTGCGGAGCTTGCCAATGCATGCTACATGGAGCGGATAGACCTTCTGCTCATGGATT<br/> TATAAAACGCCTGATATCGGCTTTGATTGGGTAGCTGGTAAAGGGACTCCATTTCAGGTACTTCACTTA<br/> TGGGGCAGCACTTGCTGAGGTTGAAATTGACACATTAGTAGGAGACTTCCATACAAGGCAGGCAGA<br/> TGTTATTTTGGATCTTGGACTTCCGTTGAATCCAGCTATTGATGTTGGGCAGATTGAAGGCGCGTTTGT<br/> GCAAGGTCTTGGATGGGTGGCTCTGGAAGAGCTAAAAATGGGGTGATGCTGCTCACAAAGTGGATACC<br/> AGCAGGATGTCTGTACACTTGCGGTCTGGTAGTTACAAGATTCCATCCATGAATGACGTCCCATTGA<br/> AATTCAATGTCTCCCTCCTGAAGGTGCGCCGAATCCTAAGGCTATCCACTCATCCAAAGCAGTGGG<br/> AGAGCCGCCCTTCTTTCTGGCCTCAGCTGTATTCTTCGCAATCAAGGATGCCATCATAGCTGCGAGGG<br/> CGGAGGTTGGTCTTAATGATTGGTTTTCTCTGGATAATCCAGCAACTCCTGAACGTATACGGATGGCT<br/> TGTGTAGACGAGTTCACAAATGCCCTTCATCGACTCTGTTTTCCATCCAAAGCTTAGTGTTAG</p> |
|--|----------------------------------------------------------------------------------------------------------------------------------------------------------------------------------------------------------------------------------------------------------------------------------------------------------------------------------------------------------------------------------------------------------------------------------------------------------------------------------------------------------------------------------------------------------------------------------------------------------------------------------------------------------------------------------------------------------------------------------------------------------------------------------------------------------------------------------------------------------------------------------------------------------------------------------------------------------------------------------------------------------------------------------------------------------------------------------------------------------------------------------------------------------------------------------------------------------------------------------------------------------------------------------------------------------------------------------------------------------------------------------------------------------------------------------------------------------------------------------------------------------------------------------------------------------------------------------------------------------------------------------------------------------------------------------------------------------------------------------------------------------------------------------------------------------------------------------------------------------------------------------------------------------------------------------------------------------------------------------------------------------------------------------------------------------------------------------------------------------------------------------------------------------------------------------------------------------------------------------------------------------------------------------------------------------------------------------------------------------------------------------------------------------------------------------------------------------------------------------------------------------------------------------------------------------------------------------------------------------------------------------------------------------------------------------------------------------------------------------------------------------------------------------------------------------------------------------------------------------------------------------------------------------------------------------------------------------------------------------------------------------------------------------------------------------------------------------------------------------------------------------------------------------------------------------------------------------------------------------------------------------------------------------------------------------------------------------------------------------------------------------------------------------------------------------------------------------------------------------------------------------------------------------------------------------------------------------------------------------------------------------------------------------------------------------------------------------------------------------------------------------------------------------------------------------------------------------------------------------------------------------|
